# Supplementary material for: Associations of Muscle Strength with Central Aspects of Pain: Data from the Knee Pain and Related Health in the Community (KPIC) Cohort
Source: MDPI journal article supplement (doi:10.3390/jpm13101450), 2023-09-29
Supplement: s1 [file s1]

## Supplementary Information

Supplement table S1. Correlations between baseline variables

|                    |     | Quad strength    | Handgrip strength | PPT            | CAPF   | Radiography (NLDA) | Osteophyte       | JSN              | Ultrasound       | US effusion      | US hypertrophy | US doppler | Average 4 week knee pain | BMI | Sex |
|--------------------|-----|------------------|-------------------|----------------|--------|--------------------|------------------|------------------|------------------|------------------|----------------|------------|--------------------------|-----|-----|
| Handgrip strength  | rho | <b>.570**</b>    |                   |                |        |                    |                  |                  |                  |                  |                |            |                          |     |     |
|                    | p   | <b>&lt;0.001</b> |                   |                |        |                    |                  |                  |                  |                  |                |            |                          |     |     |
|                    | N   | <b>311</b>       |                   |                |        |                    |                  |                  |                  |                  |                |            |                          |     |     |
| PPT                | rho | <b>.324**</b>    | <b>.353**</b>     |                |        |                    |                  |                  |                  |                  |                |            |                          |     |     |
|                    | p   | <b>&lt;0.001</b> | <b>&lt;0.001</b>  |                |        |                    |                  |                  |                  |                  |                |            |                          |     |     |
|                    | N   | <b>271</b>       | <b>273</b>        |                |        |                    |                  |                  |                  |                  |                |            |                          |     |     |
| CAPF               | rho | <b>-.397**</b>   | <b>-.284**</b>    | <b>-.204**</b> |        |                    |                  |                  |                  |                  |                |            |                          |     |     |
|                    | p   | <b>&lt;0.001</b> | <b>&lt;0.001</b>  | <b>0.002</b>   |        |                    |                  |                  |                  |                  |                |            |                          |     |     |
|                    | N   | <b>258</b>       | <b>262</b>        | <b>225</b>     |        |                    |                  |                  |                  |                  |                |            |                          |     |     |
| Radiography (NLDA) | rho | <b>-.150**</b>   | <b>-.118*</b>     | <b>-.125*</b>  | 0.075  |                    |                  |                  |                  |                  |                |            |                          |     |     |
|                    | p   | <b>0.009</b>     | <b>0.038</b>      | <b>0.041</b>   | 0.231  |                    |                  |                  |                  |                  |                |            |                          |     |     |
|                    | N   | <b>307</b>       | <b>309</b>        | <b>270</b>     | 256    |                    |                  |                  |                  |                  |                |            |                          |     |     |
| Osteophyte         | rho | -0.108           | -0.06             | <b>-.132*</b>  | 0.071  | <b>.961**</b>      |                  |                  |                  |                  |                |            |                          |     |     |
|                    | p   | 0.058            | 0.292             | <b>0.03</b>    | 0.259  | <b>&lt;0.001</b>   |                  |                  |                  |                  |                |            |                          |     |     |
|                    | N   | 307              | 309               | <b>270</b>     | 256    | <b>310</b>         |                  |                  |                  |                  |                |            |                          |     |     |
| JSN                | rho | <b>-.150**</b>   | <b>-.193**</b>    | -0.087         | 0.06   | <b>.815**</b>      | <b>.661**</b>    |                  |                  |                  |                |            |                          |     |     |
|                    | p   | <b>0.009</b>     | <b>0.001</b>      | 0.153          | 0.338  | <b>&lt;0.001</b>   | <b>&lt;0.001</b> |                  |                  |                  |                |            |                          |     |     |
|                    | N   | <b>307</b>       | <b>309</b>        | 270            | 256    | <b>310</b>         | <b>310</b>       |                  |                  |                  |                |            |                          |     |     |
| Ultrasound         | rho | -0.059           | 0.014             | -0.105         | 0.012  | <b>.513**</b>      | <b>.504**</b>    | <b>.418**</b>    |                  |                  |                |            |                          |     |     |
|                    | p   | 0.304            | 0.804             | 0.084          | 0.845  | <b>&lt;0.001</b>   | <b>&lt;0.001</b> | <b>&lt;0.001</b> |                  |                  |                |            |                          |     |     |
|                    | N   | 309              | 311               | 271            | 258    | <b>307</b>         | <b>307</b>       | <b>307</b>       |                  |                  |                |            |                          |     |     |
| US effusion        | rho | -0.062           | 0.012             | -0.077         | -0.007 | <b>.529**</b>      | <b>.505**</b>    | <b>.447**</b>    | <b>.951**</b>    |                  |                |            |                          |     |     |
|                    | p   | 0.276            | 0.838             | 0.208          | 0.914  | <b>&lt;0.001</b>   | <b>&lt;0.001</b> | <b>&lt;0.001</b> | <b>&lt;0.001</b> |                  |                |            |                          |     |     |
|                    | N   | 309              | 311               | 271            | 258    | <b>307</b>         | <b>307</b>       | <b>307</b>       | <b>312</b>       |                  |                |            |                          |     |     |
| US hypertrophy     | rho | -0.024           | 0.009             | <b>-.144*</b>  | 0.033  | <b>.450**</b>      | <b>.457**</b>    | <b>.349**</b>    | <b>.882**</b>    | <b>.718**</b>    |                |            |                          |     |     |
|                    | p   | 0.669            | 0.88              | <b>0.018</b>   | 0.6    | <b>&lt;0.001</b>   | <b>&lt;0.001</b> | <b>&lt;0.001</b> | <b>&lt;0.001</b> | <b>&lt;0.001</b> |                |            |                          |     |     |
|                    | N   | 309              | 311               | <b>271</b>     | 258    | <b>307</b>         | <b>307</b>       | <b>307</b>       | <b>312</b>       | <b>312</b>       |                |            |                          |     |     |

|                          |     |                  |                  |                  |                  |                  |                  |                  |                  |                |                |                  |                  |                |                |
|--------------------------|-----|------------------|------------------|------------------|------------------|------------------|------------------|------------------|------------------|----------------|----------------|------------------|------------------|----------------|----------------|
| US Doppler               | rho | <b>.121*</b>     | 0.11             | <b>.125*</b>     | <b>-.128*</b>    | 0.035            | 0.024            | 0.024            | <b>.207**</b>    | <b>.179**</b>  | <b>.186**</b>  |                  |                  |                |                |
|                          | p   | <b>0.032</b>     | 0.052            | <b>0.039</b>     | <b>0.04</b>      | 0.545            | 0.675            | 0.675            | <b>&lt;0.001</b> | <b>0.001</b>   | <b>0.001</b>   |                  |                  |                |                |
|                          | N   | <b>312</b>       | 314              | <b>274</b>       | <b>260</b>       | 310              | 310              | 310              | <b>312</b>       | <b>312</b>     | <b>312</b>     |                  |                  |                |                |
| Average 4 week knee pain | r   | <b>-.359**</b>   | <b>-.158**</b>   | <b>-.215**</b>   | <b>.562**</b>    | <b>.246**</b>    | <b>.243**</b>    | <b>.199**</b>    | <b>.128*</b>     | <b>.131*</b>   | 0.106          | <b>-.120*</b>    |                  |                |                |
|                          | p   | <b>&lt;0.001</b> | <b>0.005</b>     | <b>&lt;0.001</b> | <b>&lt;0.001</b> | <b>&lt;0.001</b> | <b>&lt;0.001</b> | <b>&lt;0.001</b> | <b>0.024</b>     | <b>0.02</b>    | 0.061          | <b>0.033</b>     |                  |                |                |
|                          | N   | <b>312</b>       | <b>317</b>       | <b>274</b>       | <b>264</b>       | <b>310</b>       | <b>310</b>       | <b>310</b>       | <b>312</b>       | <b>312</b>     | 312            | <b>315</b>       |                  |                |                |
| BMI                      | rho | <b>-.123*</b>    | -0.077           | <b>-.185**</b>   | <b>.290**</b>    | <b>.136*</b>     | <b>.165**</b>    | 0.059            | 0.099            | 0.089          | 0.104          | <b>-.203**</b>   | <b>.226**</b>    |                |                |
|                          | p   | <b>0.035</b>     | 0.178            | <b>0.003</b>     | <b>&lt;0.001</b> | <b>0.02</b>      | <b>0.004</b>     | 0.315            | 0.09             | 0.126          | 0.074          | <b>&lt;0.001</b> | <b>&lt;0.001</b> |                |                |
|                          | N   | <b>296</b>       | 304              | <b>260</b>       | <b>251</b>       | <b>295</b>       | <b>295</b>       | 295              | 296              | 296            | 296            | <b>299</b>       | <b>303</b>       |                |                |
| Sex                      | rho | <b>-.405**</b>   | <b>-.690**</b>   | <b>-.270**</b>   | <b>.155*</b>     | -0.038           | -0.1             | 0.089            | <b>-.169**</b>   | <b>-.151**</b> | <b>-.161**</b> | <b>-.151**</b>   | 0.109            | <b>.117*</b>   |                |
|                          | p   | <b>&lt;0.001</b> | <b>&lt;0.001</b> | <b>&lt;0.001</b> | <b>0.012</b>     | 0.507            | 0.078            | 0.118            | <b>0.003</b>     | <b>0.008</b>   | <b>0.004</b>   | <b>0.007</b>     | 0.052            | <b>0.042</b>   |                |
|                          | N   | <b>312</b>       | <b>320</b>       | <b>274</b>       | <b>264</b>       | 310              | 310              | 310              | <b>312</b>       | <b>312</b>     | <b>312</b>     | <b>315</b>       | 319              | <b>306</b>     |                |
| Age                      | rho | 0.057            | <b>-.123*</b>    | 0.01             | <b>-.140*</b>    | <b>.341**</b>    | <b>.292**</b>    | <b>.358**</b>    | <b>.172**</b>    | <b>.174**</b>  | <b>.153**</b>  | 0.101            | <b>-.152**</b>   | <b>-.173**</b> | <b>-.158**</b> |
|                          | p   | 0.317            | <b>0.028</b>     | 0.871            | <b>0.023</b>     | <b>&lt;0.001</b> | <b>&lt;0.001</b> | <b>&lt;0.001</b> | <b>0.002</b>     | <b>0.002</b>   | <b>0.007</b>   | 0.073            | <b>0.006</b>     | <b>0.002</b>   | <b>0.004</b>   |
|                          | N   | 312              | <b>320</b>       | 274              | <b>264</b>       | <b>310</b>       | <b>310</b>       | <b>310</b>       | <b>312</b>       | <b>312</b>     | <b>312</b>     | 315              | <b>319</b>       | <b>306</b>     | <b>322</b>     |

Spearman's rho, p and n= for baseline variables. Significance is shown in bold. \*\*Correlation is significant at the 0.01 level(2-tailed). \*Correlation is significant at the 0.05 level(2-tailed). *Post hoc* analysis indicated ≥82% power to detect a correlation coefficient ≥0.18 at baseline in bivariate analyses. BMI: body mass index; CAPF: central aspects of pain factor; PPT: pressure pain threshold (proximal tibial); JSN=joint space narrowing; US=ultrasound; sex: male=1 and female=2.

Supplementary Figure S1:

Scatterplots showing associations with quadriceps strength at baseline

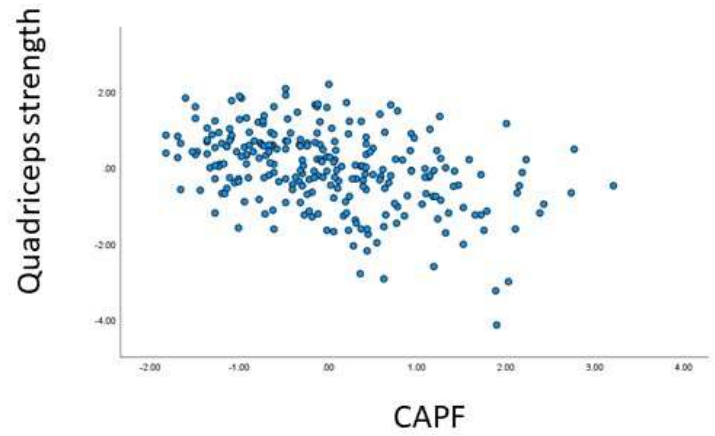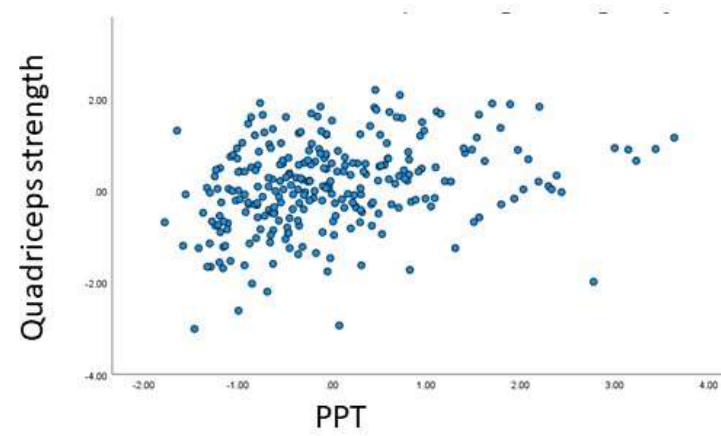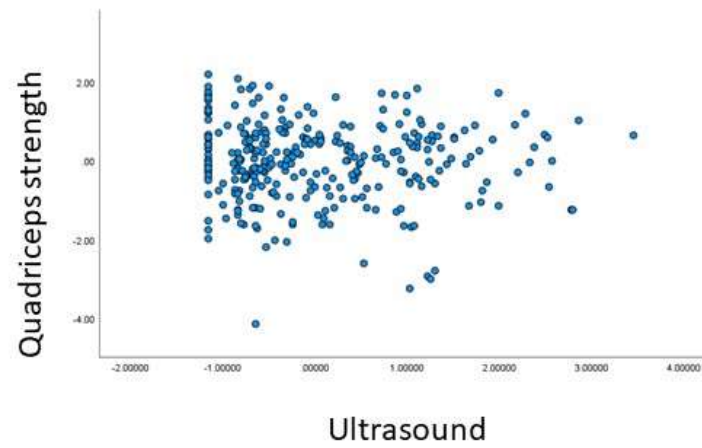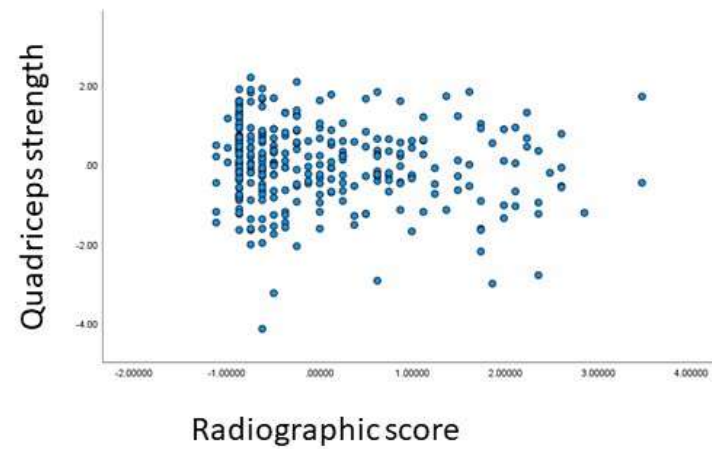

Supplement table S2: Correlation of baseline variables with year 1 muscle strength

|                                  |     | Quad strength 1<br>year | Handgrip strength 1<br>year |
|----------------------------------|-----|-------------------------|-----------------------------|
| Quad<br>strength<br>baseline     | rho | <b>.323**</b>           |                             |
|                                  | p   | <b>&lt;0.001</b>        |                             |
|                                  | N   | <b>158</b>              |                             |
| Handgrip<br>strength 1<br>year   | rho | <b>.486**</b>           |                             |
|                                  | p   | <b>&lt;0.001</b>        |                             |
|                                  | N   | <b>162</b>              |                             |
| Handgrip<br>strength<br>baseline | rho | <b>.515**</b>           | <b>.864**</b>               |
|                                  | p   | <b>&lt;0.001</b>        | <b>&lt;0.001</b>            |
|                                  | N   | <b>161</b>              | <b>165</b>                  |
| PPT                              | rho | 0.149                   | <b>.189*</b>                |
|                                  | p   | 0.066                   | <b>0.019</b>                |
|                                  | N   | 153                     | <b>153</b>                  |
| CAPF                             | rho | <b>-.263**</b>          | <b>-.340**</b>              |
|                                  | p   | <b>0.003</b>            | <b>&lt;0.001</b>            |
|                                  | N   | <b>126</b>              | <b>128</b>                  |
| Radiography                      | rho | -0.114                  | -0.051                      |
|                                  | p   | 0.153                   | 0.524                       |
|                                  | N   | 158                     | 158                         |
| Osteophyte                       | rho | -0.088                  | 0.003                       |
|                                  | p   | 0.269                   | 0.972                       |
|                                  | N   | 158                     | 158                         |
| JSN                              | rho | -0.093                  | -0.057                      |
|                                  | p   | 0.244                   | 0.474                       |
|                                  | N   | 158                     | 158                         |
| Ultrasound                       | rho | 0.044                   | 0.133                       |
|                                  | p   | 0.581                   | 0.095                       |
|                                  | N   | 159                     | 159                         |
| US effusion                      | rho | 0.015                   | 0.095                       |
|                                  | p   | 0.847                   | 0.235                       |
|                                  | N   | 159                     | 159                         |
| US<br>hypertrophy                | rho | 0.064                   | 0.154                       |
|                                  | p   | 0.424                   | 0.053                       |
|                                  | N   | 159                     | 159                         |
| US Doppler                       | rho | -0.059                  | 0.136                       |
|                                  | p   | 0.46                    | 0.086                       |
|                                  | N   | 161                     | 161                         |
| Average 4<br>week knee<br>pain   | r   | -0.099                  | -0.093                      |
|                                  | p   | 0.212                   | 0.236                       |
|                                  | N   | 162                     | 164                         |

|     |     |                  |                  |
|-----|-----|------------------|------------------|
| BMI | rho | -0.083           | -0.141           |
|     | p   | 0.304            | 0.076            |
|     | N   | 155              | 159              |
| Sex | rho | <b>-.448**</b>   | <b>-.682**</b>   |
|     | p   | <b>&lt;0.001</b> | <b>&lt;0.001</b> |
|     | N   | <b>162</b>       | <b>166</b>       |
| Age | rho | -0.139           | <b>-.159*</b>    |
|     | p   | 0.077            | <b>0.041</b>     |
|     | N   | 162              | <b>166</b>       |

\*\*Correlation is significant at the 0.01 level(2-tailed). \*Correlation is significant at the 0.05 level(2-tailed). Post hoc analysis indicated  $\geq 80\%$  power to detect  $r \geq 0.26$  between baseline variables and year 1 quadriceps strength in bivariate analyses. BMI: body mass index; CAPF: central aspects of pain factor; PPT: pressure pain threshold (proximal tibial); JSN=joint space narrowing; US=ultrasound; sex: male=1 and female=2.

Supplement table S3: Examining the component items of the Central aspects of pain factor and their association with muscle strength.

Each individual item from the CAPF was assessed for its Spearmans correlations with muscle strength at baseline and at 1 year follow up. 95% CI were calculated from 1000 bootstrap draws.

|                         |        | Baseline         |                  | 1 year           |                  |
|-------------------------|--------|------------------|------------------|------------------|------------------|
|                         |        | Quad             | Handgrip         | Quad             | Handgrip         |
| <b>Anxiety</b>          | rho    | -0.20            | -0.19            | -0.11            | -0.14            |
|                         | 95% CI | (-0.31 to -0.09) | (-0.30 to -0.07) | (-0.26 to 0.05)  | (-0.29 to 0.01)  |
|                         | p      | <0.001           | 0.001            | 0.173            | 0.068            |
| <b>Depression</b>       | rho    | -0.19            | -0.05            | -0.07            | -0.10            |
|                         | 95% CI | (-0.29 to -0.08) | (-0.16 to 0.06)  | (-0.21 to 0.08)  | (-0.25 to 0.06)  |
|                         | p      | 0.001            | 0.400            | 0.349            | 0.225            |
| <b>Neuropathic-like</b> | rho    | -0.28            | -0.22            | -0.25            | -0.29            |
|                         | 95% CI | (-0.39 to -0.17) | (-0.32 to -0.10) | (-0.40 to -0.11) | (-0.42 to -0.14) |
|                         | p      | <0.001           | <0.001           | 0.002            | <0.001           |
| <b>Cognition</b>        | rho    | -0.33            | -0.19            | -0.14            | -0.14            |
|                         | 95% CI | (-0.42 to -0.23) | (-0.30 to -0.08) | (-0.29 to 0.01)  | (-0.30 to 0.02)  |
|                         | p      | <0.001           | 0.001            | 0.074            | 0.069            |
| <b>Widespread pain</b>  | rho    | -0.12            | -0.10            | -0.18            | -0.17            |
|                         | 95% CI | (-0.23 to -0.01) | (-0.21 to 0.01)  | (-0.32 to -0.02) | (-0.33 to -0.01) |
|                         | p      | 0.030            | 0.068            | 0.025            | 0.034            |
| <b>Catastrophizing</b>  | rho    | -0.24            | -0.07            | -0.09            | -0.07            |
|                         | 95% CI | (-0.35 to -0.13) | (-0.18 to 0.04)  | (-0.24 to 0.07)  | (-0.21 to 0.09)  |
|                         | p      | <0.001           | 0.210            | 0.253            | 0.402            |
| <b>Sleep</b>            | rho    | -0.34            | -0.18            | -0.22            | -0.22            |
|                         | 95% CI | (-0.45 to -0.24) | (-0.30 to -0.06) | (-0.40 to -0.04) | (-0.36 to -0.06) |
|                         | p      | <0.001           | 0.002            | 0.010            | 0.009            |
| <b>Fatigue</b>          | rho    | -0.29            | -0.19            | -0.10            | -0.19            |
|                         | 95% CI | (-0.39 to -0.19) | (-0.29 to -0.08) | (-0.25 to 0.05)  | (-0.34 to -0.03) |
|                         | p      | <0.001           | 0.001            | 0.202            | 0.013            |

Supplementary table S4: Regression for year 1 quadriceps strength with hypertrophy replacing total ultrasound score

|                        | B     | 95% Confidence Interval for B |             | p     |
|------------------------|-------|-------------------------------|-------------|-------|
|                        |       | Lower Bound                   | Upper Bound |       |
| Age                    | -0.23 | -0.47                         | 0.00        | 0.053 |
| Female                 | -0.18 | -0.41                         | 0.06        | 0.146 |
| BML                    | 0.04  | -0.21                         | 0.29        | 0.753 |
| Baseline quad strength | 0.21  | -0.03                         | 0.44        | 0.084 |
| CAPF                   | -0.29 | -0.56                         | -0.03       | 0.032 |
| PPT                    | 0.07  | -0.14                         | 0.29        | 0.501 |
| US hypertrophy         | 0.17  | -0.15                         | 0.48        | 0.295 |
| NLDA                   | 0.04  | -0.23                         | 0.30        | 0.789 |

Supplementary table S5: Regression for year 1 quadriceps strength with effusion replacing total ultrasound score

|                        | B     | 95% Confidence Interval for B |             | p     |
|------------------------|-------|-------------------------------|-------------|-------|
|                        |       | Lower Bound                   | Upper Bound |       |
| Age                    | -0.22 | -0.46                         | 0.01        | 0.059 |
| Female                 | -0.18 | -0.41                         | 0.06        | 0.142 |
| BMI                    | 0.03  | -0.22                         | 0.28        | 0.825 |
| Baseline quad strength | 0.22  | -0.02                         | 0.46        | 0.069 |
| CAPF                   | -0.28 | -0.55                         | -0.01       | 0.040 |
| PPT                    | 0.06  | -0.15                         | 0.27        | 0.568 |
| US effusion            | 0.13  | -0.11                         | 0.37        | 0.287 |
| NLDA                   | 0.02  | -0.26                         | 0.30        | 0.900 |



Supplementary table S6: Regression for year 1 quadriceps strength with doppler replacing total ultrasound score

|                        | B     | 95% Confidence Interval for B |             | p     |
|------------------------|-------|-------------------------------|-------------|-------|
|                        |       | Lower Bound                   | Upper Bound |       |
| Age                    | -0.22 | -0.45                         | 0.01        | 0.059 |
| Female                 | -0.24 | -0.47                         | -0.02       | 0.034 |
| BMI                    | 0.01  | -0.24                         | 0.26        | 0.949 |
| Baseline quad strength | 0.20  | -0.04                         | 0.43        | 0.095 |
| CAPF                   | -0.32 | -0.58                         | -0.05       | 0.019 |
| PPT                    | 0.04  | -0.16                         | 0.24        | 0.706 |
| US doppler             | -0.08 | -0.25                         | 0.10        | 0.393 |
| NLDA                   | 0.11  | -0.12                         | 0.35        | 0.353 |

Supplementary table S7: Regression for year 1 quadriceps strength with joint space narrowing (JSN) replacing total radiography score

|                        | B     | 95% Confidence Interval for B |             | p     |
|------------------------|-------|-------------------------------|-------------|-------|
|                        |       | Lower Bound                   | Upper Bound |       |
| Age                    | -0.25 | -0.48                         | -0.01       | 0.040 |
| Female                 | -0.18 | -0.42                         | 0.06        | 0.146 |
| BMI                    | 0.03  | -0.22                         | 0.27        | 0.831 |
| Baseline quad strength | 0.22  | -0.02                         | 0.46        | 0.067 |
| CAPF                   | -0.30 | -0.57                         | -0.03       | 0.032 |
| PPT                    | 0.06  | -0.15                         | 0.27        | 0.572 |
| US                     | 0.13  | -0.13                         | 0.39        | 0.326 |
| JSN                    | 0.10  | -0.18                         | 0.39        | 0.477 |

Supplementary table S8: Regression for year 1 quadriceps strength with osteophyte (OST) replacing total radiography score

|                        | B     | 95% Confidence Interval for B |             | p     |
|------------------------|-------|-------------------------------|-------------|-------|
|                        |       | Lower Bound                   | Upper Bound |       |
| Age                    | -0.23 | -0.46                         | 0.01        | 0.055 |
| Female                 | -0.16 | -0.40                         | 0.08        | 0.176 |
| BMI                    | 0.04  | -0.21                         | 0.29        | 0.76  |
| Baseline quad strength | 0.22  | -0.02                         | 0.46        | 0.070 |
| CAPF                   | -0.28 | -0.55                         | -0.01       | 0.041 |
| PPT                    | 0.07  | -0.14                         | 0.28        | 0.508 |
| US                     | 0.17  | -0.11                         | 0.44        | 0.225 |
| OST                    | -0.01 | -0.29                         | 0.27        | 0.962 |
